# Supplementary material for: Prognostic value of C-reactive protein/albumin ratio in predicting overall survival of Chinese cervical cancer patients overall survival: comparison among various inflammation based factors
Source: PubMed Central journal article supplement — J Cancer. 2018 Apr 27;9(10):1877–84. doi: 10.7150/jca.23320 (PMC5968777; doi:10.7150/jca.23320), 2018-04-27

**Supplementary Fig. 1 The ROC curves of CRP/Alb ratio (categorical) and mGPS (categorical) for survival status in cervical squamous cell cancer.** The comparison of AUC value identified no differences in the discriminatory ability between the CRP/Alb ratio and mGPS ( $p = 0.11$ ).

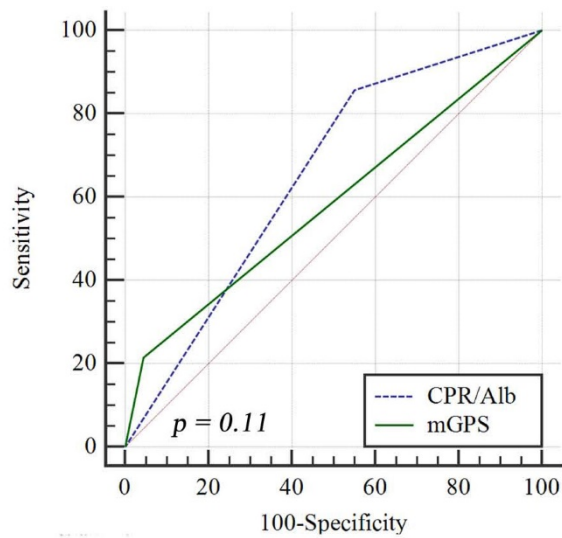

| Variable | AUC   | SE <sup>a</sup> | 95% CI <sup>b</sup> |
|----------|-------|-----------------|---------------------|
| CPR_Al   | 0.653 | 0.0338          | 0.582 to 0.719      |
| mGPS     | 0.585 | 0.0331          | 0.513 to 0.654      |

**Supplementary Fig. 2 Prognostic significance of NLR in cervical cancer patients according to different treatment methods by the Kaplan-Meier method and analyzed by the log-rank test**

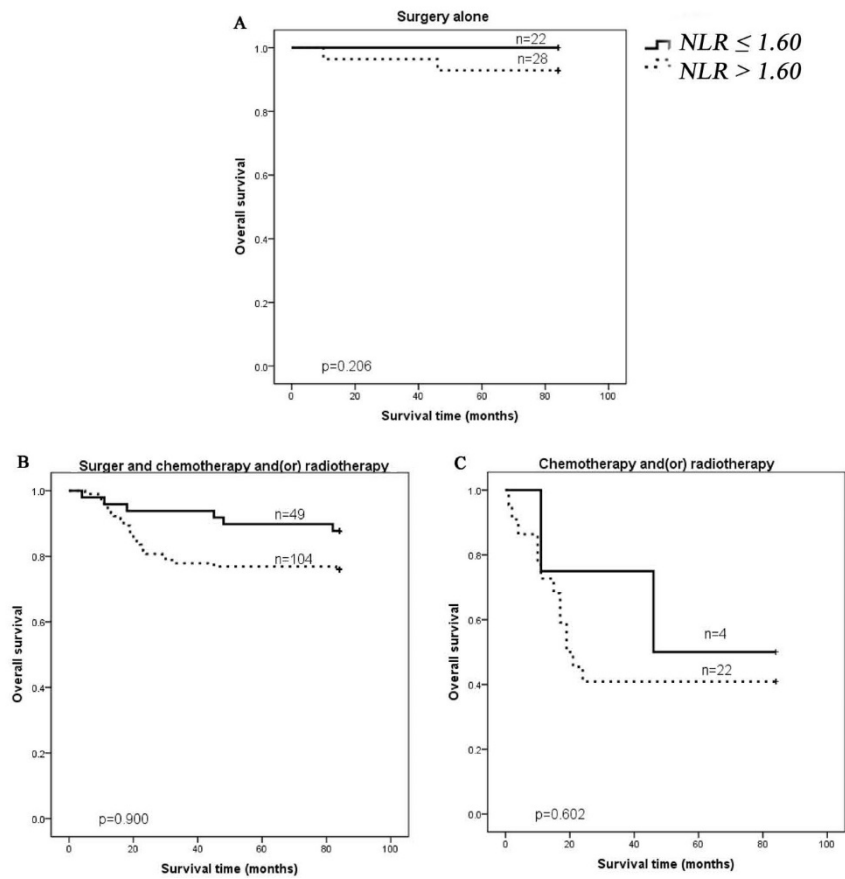

Supplement: jcav09p1877s1.pdf [file jcav09p1877s1.pdf]
